# Supplementary material for: How to Meet the Last OIE Expert Surveillance Panel Recommendations on Equine Influenza (EI) Vaccine Composition: A Review of the Process Required for the Recombinant Canarypox-Based EI Vaccine
Source: MDPI journal article supplement (doi:10.3390/pathogens5040064), 2016-11-25
Supplement: s1 [file s1]

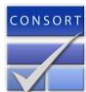

# CONSORT 2010 checklist of information to include when reporting a randomised trial\*

How to meet the last OIE expert surveillance panel recommendations on Equine Influenza (EI) vaccine composition? A review of the process required for the recombinant canarypox-based EI vaccine.

| Section/Topic             | Item No | Checklist item                                                                                                                                                                              | Reported on page No                     |
|---------------------------|---------|---------------------------------------------------------------------------------------------------------------------------------------------------------------------------------------------|-----------------------------------------|
| <b>Title and abstract</b> |         |                                                                                                                                                                                             |                                         |
|                           | 1a      | Identification as a randomised trial in the title                                                                                                                                           | Not applicable                          |
|                           | 1b      | Structured summary of trial design, methods, results, and conclusions (for specific guidance see CONSORT for abstracts)                                                                     | Not applicable                          |
| <b>Introduction</b>       |         |                                                                                                                                                                                             |                                         |
| Background and objectives | 2a      | Scientific background and explanation of rationale                                                                                                                                          | yes                                     |
|                           | 2b      | Specific objectives or hypotheses                                                                                                                                                           | yes                                     |
| <b>Methods</b>            |         |                                                                                                                                                                                             |                                         |
| Trial design              | 3a      | Description of trial design (such as parallel, factorial) including allocation ratio                                                                                                        | no                                      |
|                           | 3b      | Important changes to methods after trial commencement (such as eligibility criteria), with reasons                                                                                          | None reported                           |
| Participants              | 4a      | Eligibility criteria for participants                                                                                                                                                       | Mat & meth s6.1                         |
|                           | 4b      | Settings and locations where the data were collected                                                                                                                                        | Mat & meth s6.1                         |
| Interventions             | 5       | The interventions for each group with sufficient details to allow replication, including how and when they were actually administered                                                       | Mat & meth s6.1<br>CONSORT flow diagram |
| Outcomes                  | 6a      | Completely defined pre-specified primary and secondary outcome measures, including how and when they were assessed                                                                          | Mat & meth s6.3, s6.4 and s6.5          |
|                           | 6b      | Any changes to trial outcomes after the trial commenced, with reasons                                                                                                                       | no                                      |
| Sample size               | 7a      | How sample size was determined                                                                                                                                                              | Mat & meth s6.1                         |
|                           | 7b      | When applicable, explanation of any interim analyses and stopping guidelines                                                                                                                | Not applicable                          |
| <b>Randomisation:</b>     |         |                                                                                                                                                                                             |                                         |
| Sequence generation       | 8a      | Method used to generate the random allocation sequence                                                                                                                                      | Mat & meth s6.1                         |
|                           | 8b      | Type of randomisation; details of any restriction (such as blocking and block size)                                                                                                         | Mat & meth s6.1                         |
| Allocation concealment    | 9       | Mechanism used to implement the random allocation sequence (such as sequentially numbered containers), describing any steps taken to conceal the sequence until interventions were assigned | Not applicable                          |

|                                                      |     |                                                                                                                                                   |                                         |
|------------------------------------------------------|-----|---------------------------------------------------------------------------------------------------------------------------------------------------|-----------------------------------------|
| mechanism                                            |     |                                                                                                                                                   |                                         |
| Implementation                                       | 10  | Who generated the random allocation sequence, who enrolled participants, and who assigned participants to interventions                           | Mat & meth s6.1                         |
| Blinding                                             | 11a | If done, who was blinded after assignment to interventions (for example, participants, care providers, those assessing outcomes) and how          | Mat & meth s6.1                         |
|                                                      | 11b | If relevant, description of the similarity of interventions                                                                                       | Not applicable                          |
| Statistical methods                                  | 12a | Statistical methods used to compare groups for primary and secondary outcomes                                                                     | Mat & meth s6.6                         |
|                                                      | 12b | Methods for additional analyses, such as subgroup analyses and adjusted analyses                                                                  | Mat & meth s6.6                         |
| <b>Results</b>                                       |     |                                                                                                                                                   |                                         |
| Participant flow (a diagram is strongly recommended) | 13a | For each group, the numbers of participants who were randomly assigned, received intended treatment, and were analysed for the primary outcome    | Results, CONSORT flow diagram           |
|                                                      | 13b | For each group, losses and exclusions after randomisation, together with reasons                                                                  | CONSORT flow diagram                    |
| Recruitment                                          | 14a | Dates defining the periods of recruitment and follow-up                                                                                           | Mat & meth s6.1                         |
|                                                      | 14b | Why the trial ended or was stopped                                                                                                                | Not applicable                          |
| Baseline data                                        | 15  | A table showing baseline demographic and clinical characteristics for each group                                                                  | No                                      |
| Numbers analysed                                     | 16  | For each group, number of participants (denominator) included in each analysis and whether the analysis was by original assigned groups           | CONSORT flow diagram                    |
| Outcomes and estimation                              | 17a | For each primary and secondary outcome, results for each group, and the estimated effect size and its precision (such as 95% confidence interval) | Results                                 |
|                                                      | 17b | For binary outcomes, presentation of both absolute and relative effect sizes is recommended                                                       | Not applicable                          |
| Ancillary analyses                                   | 18  | Results of any other analyses performed, including subgroup analyses and adjusted analyses, distinguishing pre-specified from exploratory         | EIV shedding by qRT-PCR (Sup. Data. #1) |
| Harms                                                | 19  | All important harms or unintended effects in each group (for specific guidance see CONSORT for harms)                                             | None observed                           |
| <b>Discussion</b>                                    |     |                                                                                                                                                   |                                         |
| Limitations                                          | 20  | Trial limitations, addressing sources of potential bias, imprecision, and, if relevant, multiplicity of analyses                                  | No                                      |
| Generalisability                                     | 21  | Generalisability (external validity, applicability) of the trial findings                                                                         | Yes                                     |
| Interpretation                                       | 22  | Interpretation consistent with results, balancing benefits and harms, and considering other relevant evidence                                     | Yes                                     |

## Other information

|              |    |                                                                                 |                                                                           |
|--------------|----|---------------------------------------------------------------------------------|---------------------------------------------------------------------------|
| Registration | 23 | Registration number and name of trial registry                                  | Not applicable                                                            |
| Protocol     | 24 | Where the full trial protocol can be accessed, if available                     | No                                                                        |
| Funding      | 25 | Sources of funding and other support (such as supply of drugs), role of funders | Acknowledgement<br>, Author<br>contributions,<br>Conflicts of<br>Interest |

---

\*We strongly recommend reading this statement in conjunction with the CONSORT 2010 Explanation and Elaboration for important clarifications on all the items. If relevant, we also recommend reading CONSORT extensions for cluster randomised trials, non-inferiority and equivalence trials, non-pharmacological treatments, herbal interventions, and pragmatic trials. Additional extensions are forthcoming: for those and for up to date references relevant to this checklist, see [www.consort-statement.org](http://www.consort-statement.org).
