# Supplementary material for: How to Meet the Last OIE Expert Surveillance Panel Recommendations on Equine Influenza (EI) Vaccine Composition: A Review of the Process Required for the Recombinant Canarypox-Based EI Vaccine
Source: MDPI journal article supplement (doi:10.3390/pathogens5040064), 2016-11-25

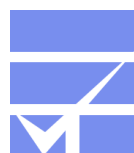

# CONSORT

TRANSPARENT REPORTING of TRIALS

**CONSORT 2010 Flow Diagram: How to meet the last OIE expert surveillance panel recommendations on Equine Influenza (EI) vaccine composition? A review of the process required for the recombinant canarypox-based EI vaccine.**

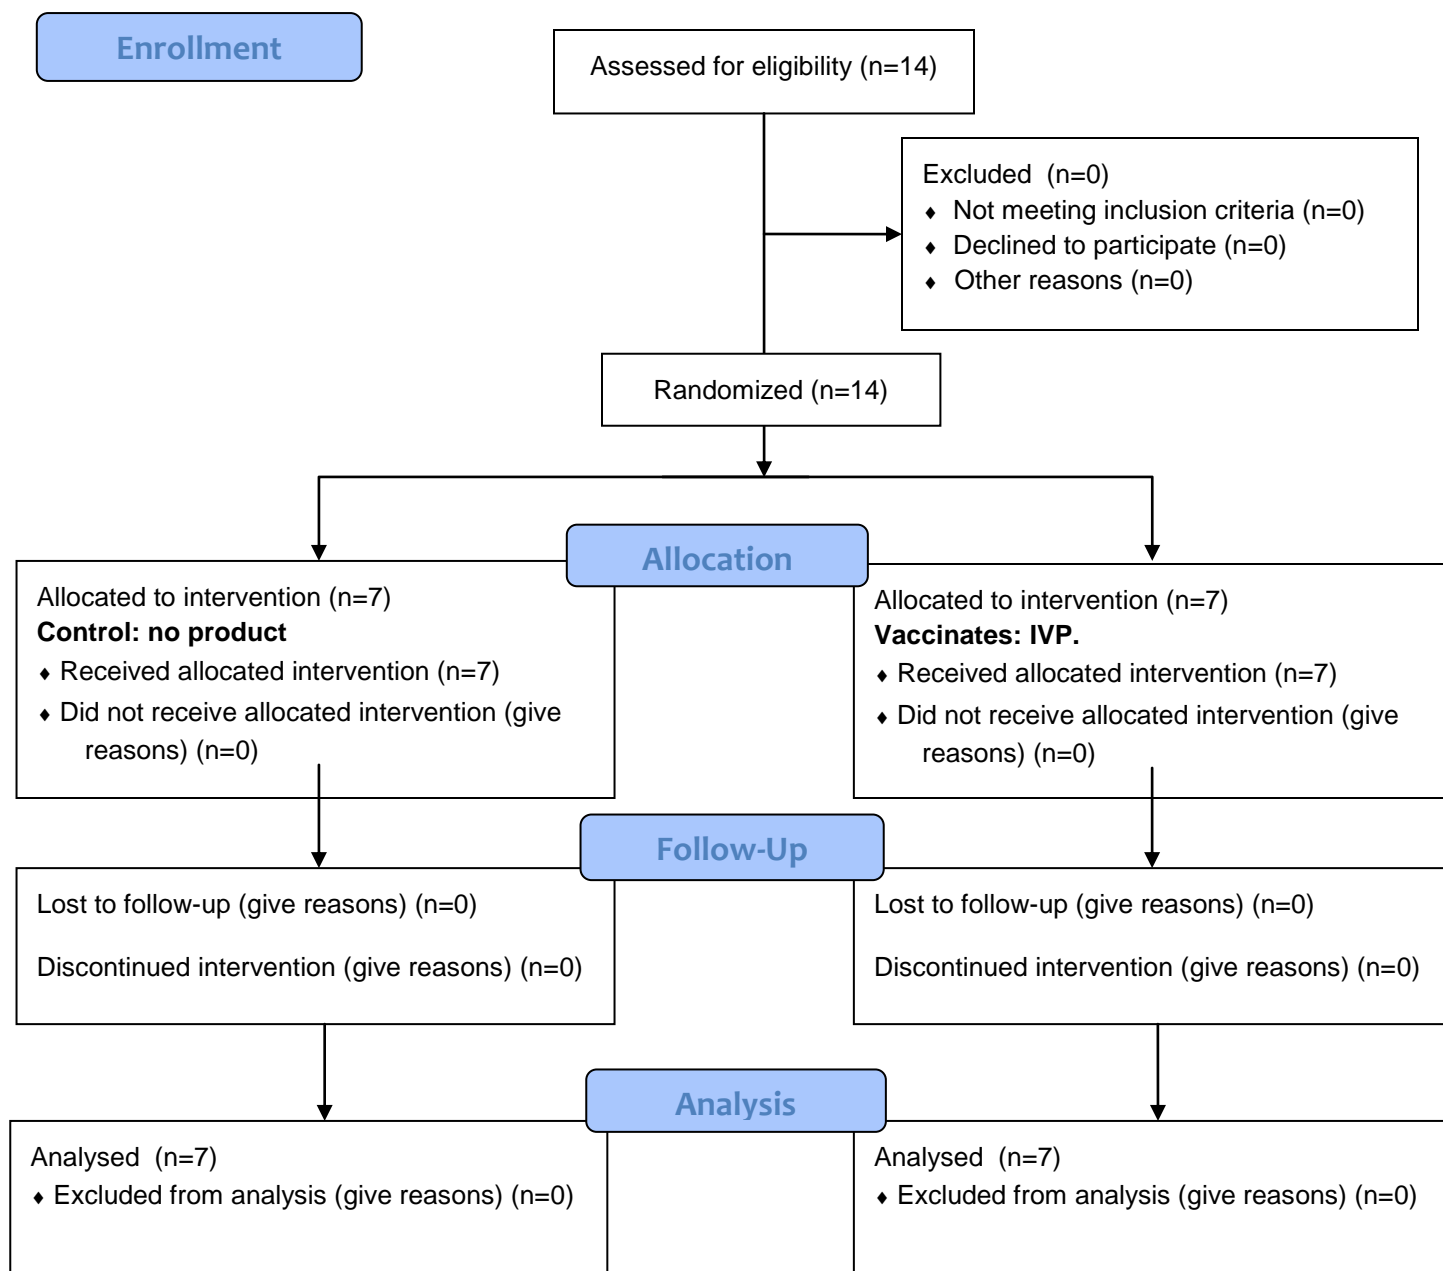

Supplement: s1 [file s1]
